# Supplementary material
Source: Royal Society of Chemistry journal article supplement (doi:10.1039/d6ce00021e)

# Energetic Crystal Engineering via Intermolecular Interactions: From Fundamental Understanding to Advanced Application

Shiyong Chen <sup>a</sup>, Hui Wang <sup>b</sup>, Yuan Gao <sup>\*,a</sup>, Xin Huang <sup>\*,b</sup>, Hongxun Hao <sup>b</sup>

**Scheme S1.** Molecular structures of the mentioned compounds.

| Compound Name                                                       | Abbreviation | Molecular Structure |
|---------------------------------------------------------------------|--------------|---------------------|
| 1 <i>H</i> ,1' <i>H</i> -5,5'-Bitetrazole-1,1'-diolate              | BTO          |                     |
| 1 <i>H</i> ,4 <i>H</i> -3,6-Dinitropyrazolo[4,3- <i>c</i> ]pyrazole | DNPP         |                     |
| 1-Amino-1,2,3-triazole                                              | ATZ          |                     |
| 1-Methyl-3,4,5-trinitropyrazole                                     | MTNP         |                     |
| 1-Methyl-3,5-dinitro-1,2,4-triazole                                 | MDNT         |                     |
| 1-Methyl-4,5-dinitroimidazole                                       | 4,5-MDNI     |                     |
| 1-Nitronaphthalene                                                  | NNAP         |                     |

<sup>a</sup>School of Chemistry and Chemical Engineering, Nanjing University of Science and Technology, Nanjing, 210094, China.

<sup>b</sup>School of Chemical Engineering and Technology, Tianjin University, Tianjin, 300072, China.

|                                                            |       |                                                                                      |
|------------------------------------------------------------|-------|--------------------------------------------------------------------------------------|
| 1-Trinitromethyl-3,4,5-trinitropyrazole                    | TTP   | 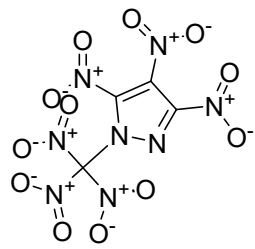   |
| 1-Trinitromethyl-3,5-dinitro-4-nitroaminopyrazole          | DNTP  |    |
| 2,2-Dinitroethene-1,1-diamine                              | FOX-7 |   |
| 2,4,6,8,10,12-Hexanitro-2,4,6,8,10,12-hexaazaisowurtzitane | CL-20 |   |
| 2,4,6-Trinitrobenzene-1,3,5-triamine                       | TATB  |  |
| 2,4,6-Trinitrobenzene-1,3-diamine                          | DATB  |  |
| 2,4,6-Trinitrochlorobenzene                                | TNCB  |  |
| 2,4,6-Trinitrocyclohexa-1,5-diene-1,3-diol                 | DNDP  |  |

|                                                                                               |          |                                                                                       |
|-----------------------------------------------------------------------------------------------|----------|---------------------------------------------------------------------------------------|
| 2,4-Dinitro-2,4-diazapentane                                                                  | DNDAP    | 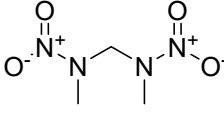    |
| 2,4-Dinitroimidazole                                                                          | 2,4-MDNI |     |
| 2,6-Bis(picrylamino)-3,5-dinitropyridine                                                      | PYX      |     |
| 2,6-Diamino-3,5-dinitropyrazine-1-oxide                                                       | LLM-105  |    |
| 2,6-Diamino-4-((5-cyano-1 <i>H</i> -1,2,3-triazol-4-yl)amino)-1,3,5-triazin-1-ium perchlorate | -        |   |
| 2-Nitroaniline                                                                                | ONA      |  |
| 2-Nitroguanidine                                                                              | NQ       |  |
| 2'-(1 <i>H</i> -Pyrazol-4-yl)-1 <i>H</i> ,2'- <i>H</i> -5,5'-bistetrazole                     | -        |   |
| 3-(2 <i>H</i> -Tetrazol-5-yl)-[1,2,4]triazolo[5,1- <i>c</i> ][1,2,4]triazin-4-amine           | -        |   |
| 3,4-Diaminofurazan                                                                            | DAF      |  |

|                                                                                         |         |                                                                                       |
|-----------------------------------------------------------------------------------------|---------|---------------------------------------------------------------------------------------|
| 3,4-Dinitropyrazole                                                                     | 3,4-DNP | 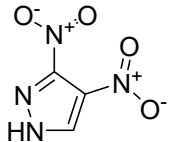   |
| 3,6,7-Triamino-7 <i>H</i> -[1,2,4]triazolo[4,3- <i>b</i> ][1,2,4]triazole               | TATOT   |     |
| 3-Amino-4-azidoethoxyfurazan                                                            | AAeF    |     |
| 3-Nitro-1,2,4-triazol-5-one                                                             | NTO     |     |
| 4 <i>H</i> ,8 <i>H</i> -Bis([1,2,5]oxadiazolo)[3,4- <i>b</i> :3',4'- <i>e</i> ]pyrazine | DFP     |    |
| 5,5'-Azotetrazole sodium                                                                | -       |   |
| 5,5'-Dinitro-2 <i>H</i> ,2 <i>H'</i> -3,3'-bi-1,2,4-triazole                            | DNBT    |   |
| 5,6,7,8-Tetrahydrotetrazolo[1,5- <i>b</i> ][1,2,4]-triazine                             | TZTN    |  |
| 5-Amino-1,3,4-oxadiazole-2-carbohydrazide                                               | HAOC    |   |
| 5-Amino-3-nitro-1 <i>H</i> -1,2,4-triazole                                              | ANTA    |   |
| 5-Nitrotetrazole                                                                        | -       |  |

|                                                               |       |                                                                                       |
|---------------------------------------------------------------|-------|---------------------------------------------------------------------------------------|
| 5-Nitrothiazole sodium                                        | -     | 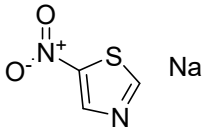    |
| 9,10-Bis(nitratomethyl)-9,10-diiido-2,4,6,8-tetraoxadamantane | -     |     |
| Ammonium dinitramide                                          | ADN   |     |
| Ammonium nitrate                                              | AN    |     |
| Benzotrifuroxan                                               | BTF   |    |
| Diaminoazoxyfurazan                                           | DAAF  |   |
| Diaminobistriazolotetrazine dizwitterion                      | TYX-1 |   |
| Diaminohydrazofurazan                                         | DAAzF |   |
| Dinitrobenzene                                                | DNB   |  |
| Erythritol tetranitrate                                       | ETN   |   |

|                                       |      |                                                                                       |
|---------------------------------------|------|---------------------------------------------------------------------------------------|
| Glycidyl azide polymer                | GAP  | 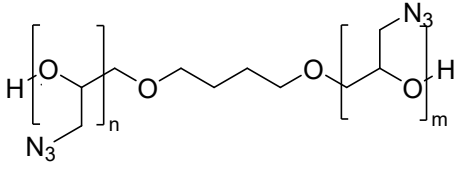    |
| Hexanitrostilbene                     | HNS  |     |
| Hexogen                               | RDX  |     |
| Hydrazine 3-nitro-1,2,4-triazol-5-one | HNTO |     |
| Melaminium nitroformate               | MaNF |   |
| Nitroglycerin                         | -    |   |
| Nitromethane                          | -    |  |
| Octogen                               | HMX  |   |
| Pentaerythritol tetranitrate          | PETN |   |

---

Potassium 3,5-dinitro-6-oxo-1,6-dihydropyrazin-2-olate

KDNODP

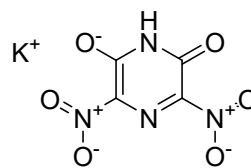

Trinitramide

TNA

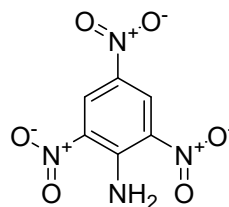

Trinitrobenzene

TNB

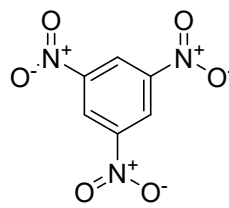

Trinitrotoluene

TNT

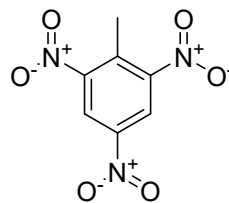

Supplement: d6ce00021e1.pdf [file d6ce00021e1.pdf]
